# Supplementary material for: Native High Density Lipoproteins (HDL) Interfere with Platelet Activation Induced by Oxidized Low Density Lipoproteins (OxLDL)
Source: Int J Mol Sci. 2013 May 10;14(5):10107–21. doi: 10.3390/ijms140510107 (PMC3676831; doi:10.3390/ijms140510107)

## Supplementary Information

**Figure S1.** Effect of human serum albumin (HSA; 50–400  $\mu\text{g/mL}$ ) on surface expression of CD40L (a) and CD62P (b) induced by hyp-OxLDL (100  $\mu\text{g/mL}$ ). Means  $\pm$  SD of 6 experiments.

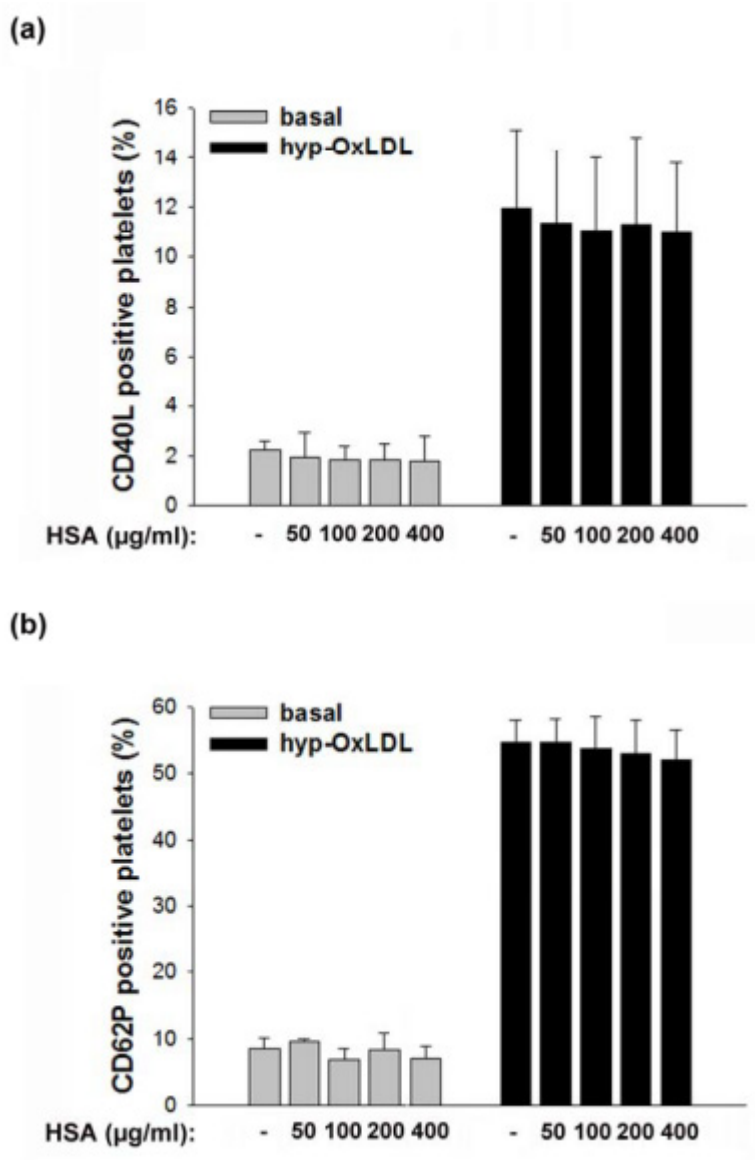

Supplement: Supplementary file 1 [file ijms-14-10107-s001.pdf]
